# Supplementary material
Source: Elsevier journal article supplement (https://comptes-rendus.academie-sciences.fr/biologies/article/10.1016/j.crvi.2015.10.001/file/attach/mmc1.pdf)
Supplement: mmc1 [file mmc1.pdf]

Annexe : Variables utilisées pour la modélisation des scènes de végétation par type moyen (1 à 5) et variantes a et b (sous FIRETEC).

Appendix: Data used for the modelling of vegetation scenes per mean vegetation type (1 to 5) and two different cases (a and b).

| Types | Espèces | Hauteur moy (cm) | Bas strate (cm) | Recouvrement (%) | L (cm) | TE (% du poids sec) | rho (kg/m <sup>3</sup> ) | ss (F-04 m) |
|-------|---------|------------------|-----------------|------------------|--------|---------------------|--------------------------|-------------|
| 1     | OUIII   | 719              | 191             | 11               | 413    | 59                  | 0.48                     | 3850        |
|       | OUPLI   | 810              | 271             | 9.1              | 554    | 63                  | 0.48                     | 3850        |
|       | OUSII   | 692              | 286             | 18               | 422    | 60                  | 0.17                     | 6140        |
|       | ARIIN   | 346              |                 | 8.2              | 258    | 81                  | 0.7                      | 5260        |
|       | CASP    | 149              |                 | 7.5              | 143    | 45                  | 0.31                     | 2330        |
|       | FRAR    | 237              |                 | 17               | 264    | 52                  | 0.94                     | 7520        |
|       | OUSII   | 148              |                 | 5.5              | 136    | 60                  | 0.56                     | 5480        |
|       | CIMO    | 82               |                 | 6.0              | 80     | 53                  | 0.39                     | 3170        |
|       | OUIII   | 683              | 222             | 6.2              | 285    | 59                  | 0.48                     | 3850        |
| 1a    | OUPLI   | 1150             | 462             | 47               | 411    | 63                  | 0.48                     | 3850        |
|       | OUSII   | 461              | 229             | 6.6              | 188    | 60                  | 0.23                     | 6140        |
|       | FRAR    | 103              |                 | 11               | 183    | 52                  | 0.95                     | 7.580       |
|       | HFRR    | 30               |                 | 24               | 100    | 15                  | 0.44                     | 20000       |
|       | SN      | 0                |                 | 6.3              | 105    |                     |                          |             |
|       | OUPLI   | 425              | 160             | 10               | 287    | 63                  | 0.48                     | 3720        |
| 1b    | OUSII   | 605              | 239             | 34               | 400    | 60                  | 0.2                      | 6140        |
|       | CIMO    | 82               |                 | 8.4              | 79     | 53                  | 0.39                     | 3170        |
|       | CIMO m  | 108              |                 | 2.6              | 83     | 10                  | 0.39                     | 3170        |
|       | FRAR    | 172              |                 | 14               | 96     | 52                  | 0.94                     | 7520        |
|       | FRAR m  | 190              |                 | 2.5              | 101    | 10                  | 0.94                     | 7520        |
|       | HFRR    | 30               |                 | 5                | 100    | 15                  | 0.44                     | 20000       |
|       | SN      | 0                |                 | 1.8              | 71     |                     |                          |             |
|       | OUIII   | 626              | 226             | 8                | 382    | 59                  | 0.48                     | 3720        |
| 2     | OUPLI   | 521              | 219             | 8.8              | 244    | 63                  | 0.48                     | 3720        |
|       | OUSII   | 610              | 256             | 14               | 353    | 60                  | 0.2                      | 6140        |
|       | ARIIN   | 297              |                 | 13               | 209    | 81                  | 0.71                     | 5260        |
|       | CASP    | 177              |                 | 7.3              | 146    | 45                  | 0.4                      | 2330        |
|       | FRAR    | 234              |                 | 19               | 244    | 52                  | 0.94                     | 7520        |
|       | OUPLI   | 149              |                 | 5.8              | 155    | 63                  | 1.5                      | 3800        |
|       | CIMO    | 132              |                 | 6.8              | 80     | 53                  | 0.52                     | 3030        |
|       | OUSII   | 709              | 189             | 24               | 615    | 60                  | 0.17                     | 6140        |
|       | 2a      | ARIIN            | 344             |                  | 37     | 150                 | 81                       | 0.7         |
| CIMO  |         | 245              |                 | 4.6              | 150    | 53                  | 0.49                     | 3000        |
| FRAR  |         | 301              |                 | 34               | 150    | 52                  | 0.95                     | 7520        |
| OUSII |         | 686              | 316             | 50               | 311    | 60                  | 0.17                     | 6140        |
| 2b    | ARIIN   | 286              |                 | 24               | 123    | 81                  | 0.71                     | 5260        |
|       | FRAR    | 247              |                 | 29               | 132    | 52                  | 0.94                     | 7520        |
|       | FRAR m  | 250              |                 | 4.6              | 13     | 10                  | 0.94                     | 7520        |
|       | SN      | 0                |                 | 4.0              | 10     |                     |                          |             |

| Types | Espèces | Hauteur moy (cm) | Bas strate (cm) | Recouvrement (%) | L (cm) | TE (% du poids sec) | rho (kg/m <sup>3</sup> ) | SVR (1/m-) |
|-------|---------|------------------|-----------------|------------------|--------|---------------------|--------------------------|------------|
| 3     | OUIL    | 512              | 120,5           | 3,96             | 316,5  | 59                  | 0,48                     | 3720       |

|       |         |                  |                 |                  |        |                     |                          |             |
|-------|---------|------------------|-----------------|------------------|--------|---------------------|--------------------------|-------------|
|       | QUPU    | 468,68           | 101,38          | 7,26             | 293,81 | 63                  | 0,48                     | 3720        |
|       | QUSU    | 605,26           | 206,78          | 14,97            | 335,37 | 60                  | 0,2                      | 6140        |
|       | ARUN    | 214,59           |                 | 9,12             | 185    | 81                  | 0,76                     | 5290        |
|       | CASP    | 165,56           |                 | 6,02             | 110    | 45                  | 0,4                      | 2330        |
|       | ERAR    | 203,34           |                 | 22,47            | 210,02 | 52                  | 0,94                     | 7520        |
|       | CIMO    | 139,73           |                 | 7,97             | 100    | 53                  | 0,52                     | 3030        |
|       | HERB    | 67,22            |                 | 10,34            | 100    | 15                  | 0,44                     | 20000       |
| 3a    | QUIL    | 374              | 166             | 7,95             | 309    | 59                  | 0,48                     | 3720        |
|       | QUPU    | 502              | 215             | 16,27            | 319,72 | 63                  | 0,48                     | 3720        |
|       | QUSU    | 475              | 214,42          | 37,21            | 210,74 | 60                  | 0,23                     | 6140        |
|       | CIMO    | 125,71           |                 | 8,23             | 206,64 | 53                  | 0,52                     | 3050        |
|       | ERAR    | 126              |                 | 30,34            | 264,7  | 52                  | 0,95                     | 7.580       |
| 3b    | QUSU    | 582,5            | 232,5           | 17,42            | 547,5  | 60                  | 0,2                      | 6140        |
|       | CIMO    | 99,09            |                 | 14,85            | 106,23 | 53                  | 0,54                     | 3070        |
|       | ERAR    | 171,94           |                 | 25,43            | 108,92 | 52                  | 0,96                     | 7.580       |
|       | CASP    | 212,3            |                 | 12,28            | 102,1  | 81                  | 0,4                      | 2330        |
| 4     | QUIL    | 521,26           | 253,98          | 21,36            | 417,39 | 59                  | 0,48                     | 3720        |
|       | QUSU    | 601,81           | 246,47          | 16,27            | 349,97 | 60                  | 0,2                      | 6140        |
|       | ARUN    | 249,05           |                 | 8,11             | 236,67 | 81                  | 0,73                     | 5280        |
|       | CASP    | 189,05           |                 | 10,3             | 200,42 | 45                  | 0,4                      | 2330        |
|       | ERAR    | 155,91           |                 | 4,79             | 199,17 | 52                  | 0,95                     | 7580        |
|       | QUIL    | 223,82           |                 | 5,2              | 237,57 | 59                  | 1,5                      | 3800        |
|       | CIAL    | 116,67           |                 | 4,71             | 60     | 54                  | 0,49                     | 3100        |
|       | CIMO    | 139,32           |                 | 6,52             | 100    | 53                  | 0,52                     | 3030        |
| 4a    | QUIL    | 310              | 100             | 4                | 460    | 59                  | 0,48                     | 3720        |
|       | QUSU    | 487              | 107,37          | 14,6             | 197,63 | 60                  | 0,23                     | 6140        |
|       | CASP    | 219,67           |                 | 6,44             | 135    | 45                  | 0,4                      | 2330        |
|       | ERAR    | 193,14           |                 | 15,03            | 135    | 52                  | 0,94                     | 7520        |
|       | QUIL    | 223              |                 | 4,29             | 135    | 59                  | 1,5                      | 3800        |
|       | QUSU    | 248,33           |                 | 6,44             | 135    | 60                  | 0,79                     | 6140        |
|       | CIMO    | 129,4            |                 | 21,47            | 135    | 53                  | 0,52                     | 3050        |
|       | CIMO_m  | 150,38           |                 | 17,18            | 135    | 10                  | 0,52                     | 3050        |
|       | SN      | 0                |                 | 4,29             | 135    |                     |                          |             |
| 4b    | QUPU    | 510              | 116,67          | 8,11             | 348,33 | 59                  | 0,48                     | 3720        |
|       | QUSU    | 468,57           | 140             | 9,91             | 257,5  | 60                  | 0,23                     | 6140        |
|       | CASP    | 182,5            |                 | 17,18            | 135    | 45                  | 0,4                      | 2330        |
|       | CASP_m  | 193,33           |                 | 6,44             | 135    | 10                  | 0,4                      | 2330        |
|       | CIAL    | 116,67           |                 | 12,88            | 135    | 54                  | 0,49                     | 3100        |
|       | CIMO    | 108,21           |                 | 30,06            | 135    | 53                  | 0,54                     | 3070        |
|       | SN      | 0                |                 | 4,29             | 135    |                     |                          |             |
| Types | Espèces | Hauteur moy (cm) | Bas strate (cm) | Recouvrement (%) | L (cm) | TE (% du poids sec) | rho (kg/m <sup>3</sup> ) | ss (E-04 m) |
| 5     | QUSU    | 532,65           | 149,8           | 16,19            | 301,68 | 60                  | 0,23                     | 6140        |

|    |      |        |        |       |        |    |      |       |
|----|------|--------|--------|-------|--------|----|------|-------|
|    | ARUN | 123,63 |        | 5,62  | 153,33 | 81 | 0,81 | 5390  |
|    | CASP | 115,49 |        | 13,83 | 138,65 | 45 | 0,28 | 23300 |
|    | ERAR | 129,62 |        | 12,27 | 146,64 | 52 | 0,95 | 7.580 |
|    | QUSU | 125,62 |        | 7,09  | 173,04 | 60 | 1    | 7040  |
|    | CIAL | 66,67  |        | 5,09  | 50     | 54 | 0,85 | 3160  |
|    | CIMO | 78,05  |        | 11,62 | 50     | 53 | 0,39 | 3170  |
|    | CISA | 55,98  |        | 8,65  | 50     | 55 | 0,39 | 3170  |
|    | QUSU | 216,29 | 95     | 18,02 | 187,92 | 60 | 0,79 | 6140  |
|    | CASP | 124,55 |        | 3,14  | 116,59 | 45 | 0,28 | 23300 |
| 5a | ERAR | 113    |        | 5,71  | 131,83 | 52 | 0,95 | 7.580 |
|    | CIMO | 100    |        | 38    | 50     | 53 | 0,39 | 3170  |
|    | QUSU | 642,27 | 271,82 | 18,99 | 286,36 | 60 | 0,69 | 6100  |
|    | HERB | 63,33  |        | 6,44  | 135    | 15 | 0,44 | 20000 |
|    | CASP | 150    |        | 19,32 | 135    | 45 | 0,31 | 23300 |
|    | ERAR | 80     |        | 2,15  | 135    | 52 | 0,95 | 7580  |
|    | QUSU | 152,5  |        | 8,59  | 135    | 60 | 0,79 | 6140  |
|    | CIAL | 83,33  |        | 6,44  | 135    | 54 | 0,85 | 3160  |
|    | CIMO | 105    |        | 21,47 | 135    | 53 | 0,54 | 3070  |
|    | CISA | 63,33  |        | 6,44  | 135    | 55 | 0,39 | 3170  |
| 5b | SN   | 0      |        | 4,29  | 135    |    |      |       |

arbres

arbustes et nappes dont herbacées

Notes : - une rééquilibrage des pourcentages de recouvrement a été réalisée lorsque le total dépassait 100%.

- certaines données absentes de teneurs en eau ont été extrapolées : ciste de Montpellier (CIMO) pour ciste à feuilles

de sauge (CISA), chêne vert (QUIL) pour chêne pubescent (QUPU).

L taille caractéristique ; TE teneur en eau ; %rho masse volumique (kg/m<sup>3</sup>) ; %ss (échelle de longueur caractérisant l'épaisseur de la particule de combustible. Elle est prise égale à 2/sigma dans FIRETEC où sigma est le rapport surface/volume de la particule).

Codes espèces : ARUN *Arbutus unedo* L. ; CASP *Calicotome spinosa* Link ; CASP\_m *Calicotome spinosa* mort ; CIAL *Cistus albidus* L. ; CIMO *Cistus monspeliensis* L. ; CIMO\_m *Cistus monspeliensis* mort ; CISA *Cistus salvifolius* L. ; ERAR *Erica arborea* L. ; ERAR\_m *Erica arborea* mort ; HERB Herbacées ; PIPINAS *Pinus pinaster* Aiton ; QUIL *Quercus ilex* L. ; QUPU *Quercus pubescens* Willdenow ; QUSU *Quercus suber* L. ; SN Sol nu.
